# Supplementary material for: Nutritional Niches of Cancer Therapy-Induced Senescent Cells
Source: MDPI journal article supplement (doi:10.3390/nu14173636), 2022-09-02
Supplement: s1 [file s1]

## **SUPPLEMENTARY INFORMATION**

**Table S1. Raw dye reduction mean values (590 nm) of metabolite array from the PM-M1 microplate.**

|                                               | <b>CONTROL</b> | <b>ALISERTIB</b> | <b>DOXORUBICIN</b> | <b>CONTROL</b> | <b>BLEOMYCIN</b> | <b>PALBOCICLIB</b> |
|-----------------------------------------------|----------------|------------------|--------------------|----------------|------------------|--------------------|
| <b>negative control</b>                       | 0,164          | 0,228            | 0,261              | 0,159          | 0,262            | 0,245              |
| <b>negative control</b>                       | 0,146          | 0,227            | 0,264              | 0,150          | 0,283            | 0,250              |
| <b>negative control</b>                       | 0,143          | 0,243            | 0,272              | 0,148          | 0,274            | 0,231              |
| <b><math>\alpha</math>-Cyclodextrin</b>       | 0,148          | 0,189            | 0,255              | 0,158          | 0,229            | 0,207              |
| <b>Dextrin</b>                                | 1,817          | 1,895            | 1,751              | 1,252          | 1,660            | 1,823              |
| <b>Glycogen</b>                               | 2,138          | 2,047            | 1,738              | 2,244          | 2,182            | 1,780              |
| <b>Maltitol</b>                               | 0,159          | 0,194            | 0,226              | 0,159          | 0,210            | 0,182              |
| <b>Maltotriose</b>                            | 1,954          | 1,456            | 1,600              | 1,742          | 2,052            | 1,477              |
| <b>D-Maltose</b>                              | 3,014          | 1,931            | 2,668              | 2,946          | 2,614            | 2,078              |
| <b>D-Trehalose</b>                            | 0,182          | 0,228            | 0,280              | 0,205          | 0,275            | 0,209              |
| <b>D-Cellobiose</b>                           | 0,143          | 0,188            | 0,269              | 0,152          | 0,201            | 0,204              |
| <b><math>\beta</math>-Gentiobiose</b>         | 0,144          | 0,180            | 0,230              | 0,148          | 0,213            | 0,173              |
| <b>D-Glucose-6-P</b>                          | 0,386          | 0,463            | 0,635              | 0,324          | 0,756            | 0,278              |
| <b><math>\alpha</math>-D-Glucose-1-P</b>      | 0,545          | 0,415            | 0,977              | 0,169          | 0,470            | 0,578              |
| <b>L-Glucose</b>                              | 0,152          | 0,203            | 0,353              | 0,215          | 0,284            | 0,222              |
| <b><math>\alpha</math>-D-Glucose</b>          | 3,068          | 1,980            | 2,586              | 2,957          | 2,777            | 2,127              |
| <b><math>\alpha</math>-D-Glucose</b>          | 3,051          | 2,078            | 2,732              | 3,012          | 2,618            | 2,195              |
| <b><math>\alpha</math>-D-Glucose</b>          | 2,941          | 2,322            | 2,529              | 3,045          | 2,829            | 1,975              |
| <b>3-O-Methyl-D-Glucoside</b>                 | 0,195          | 0,220            | 0,404              | 0,209          | 0,271            | 0,183              |
| <b><math>\alpha</math>-Methyl-D-Glucoside</b> | 0,151          | 0,202            | 0,393              | 0,179          | 0,266            | 0,207              |
| <b><math>\beta</math>-Methyl-D-Glucoside</b>  | 0,153          | 0,211            | 0,412              | 0,202          | 0,256            | 0,223              |
| <b>D-Salicin</b>                              | 0,228          | 0,265            | 0,482              | 0,235          | 0,329            | 0,227              |
| <b>D-Sorbitol</b>                             | 0,149          | 0,199            | 0,410              | 0,162          | 0,244            | 0,223              |

|                                                  |       |       |       |       |       |       |
|--------------------------------------------------|-------|-------|-------|-------|-------|-------|
| <b>N-Acetyl-D-Glucosamine</b>                    | 0,143 | 0,193 | 0,293 | 0,155 | 0,237 | 0,184 |
| <b>D-Glucosaminic Acid</b>                       | 0,144 | 0,267 | 0,315 | 0,149 | 0,291 | 0,262 |
| <b>D-Glucuronic Acid</b>                         | 0,153 | 0,203 | 0,382 | 0,177 | 0,299 | 0,229 |
| <b>Chondroitin-6-Sulfate</b>                     | 0,203 | 0,263 | 0,381 | 0,268 | 0,355 | 0,266 |
| <b>Mannan</b>                                    | 0,218 | 0,273 | 0,419 | 0,291 | 0,338 | 0,227 |
| <b>D-Mannose</b>                                 | 2,648 | 1,486 | 1,908 | 2,532 | 2,237 | 1,764 |
| <b><math>\alpha</math>-Methyl-D-Mannoside</b>    | 0,154 | 0,246 | 0,365 | 0,264 | 0,293 | 0,227 |
| <b>D-Mannitol</b>                                | 0,140 | 0,201 | 0,334 | 0,261 | 0,269 | 0,215 |
| <b>N-Acetyl-<math>\beta</math>-D-Mannosamine</b> | 0,154 | 0,210 | 0,387 | 0,260 | 0,268 | 0,221 |
| <b>D-Melezitose</b>                              | 0,190 | 0,220 | 0,360 | 0,268 | 0,273 | 0,239 |
| <b>Sucrose</b>                                   | 0,195 | 0,231 | 0,402 | 0,275 | 0,269 | 0,227 |
| <b>Palatinose</b>                                | 0,161 | 0,217 | 0,375 | 0,178 | 0,253 | 0,241 |
| <b>D-Turanose</b>                                | 0,238 | 0,306 | 0,408 | 0,248 | 0,448 | 0,263 |
| <b>D-Tagatose</b>                                | 0,168 | 0,236 | 0,271 | 0,178 | 0,282 | 0,214 |
| <b>L-Sorbose</b>                                 | 0,166 | 0,238 | 0,366 | 0,229 | 0,314 | 0,251 |
| <b>L-Rhamnose</b>                                | 0,185 | 0,259 | 0,334 | 0,264 | 0,302 | 0,230 |
| <b>L-Fucose</b>                                  | 0,217 | 0,224 | 0,349 | 0,257 | 0,285 | 0,234 |
| <b>D-Fucose</b>                                  | 0,238 | 0,249 | 0,326 | 0,308 | 0,322 | 0,251 |
| <b>D-Fructose-6-P</b>                            | 0,403 | 0,500 | 0,889 | 0,459 | 0,656 | 0,464 |
| <b>D-Fructose</b>                                | 0,240 | 0,243 | 0,422 | 0,299 | 0,408 | 0,254 |
| <b>Stachyose</b>                                 | 0,184 | 0,219 | 0,357 | 0,238 | 0,274 | 0,223 |
| <b>D-Raffinose</b>                               | 0,203 | 0,207 | 0,357 | 0,250 | 0,272 | 0,255 |
| <b>D-Lactiol</b>                                 | 0,204 | 0,218 | 0,370 | 0,267 | 0,292 | 0,238 |
| <b>Lactulose</b>                                 | 0,163 | 0,213 | 0,370 | 0,186 | 0,257 | 0,224 |
| <b><math>\alpha</math>-D-Lactose</b>             | 0,145 | 0,195 | 0,257 | 0,151 | 0,233 | 0,180 |
| <b>Melibionnic Acid</b>                          | 0,154 | 0,231 | 0,282 | 0,165 | 0,300 | 0,239 |

|                                  |       |       |       |       |       |       |
|----------------------------------|-------|-------|-------|-------|-------|-------|
| <b>D-Melibiose</b>               | 0,159 | 0,214 | 0,390 | 0,170 | 0,277 | 0,243 |
| <b>D-Galactose</b>               | 0,441 | 0,297 | 0,519 | 0,482 | 0,639 | 0,389 |
| <b>α-Methyl-D-Galactoside</b>    | 0,201 | 0,219 | 0,346 | 0,260 | 0,287 | 0,244 |
| <b>β-Methyl-D-Galactoside</b>    | 0,223 | 0,227 | 0,379 | 0,289 | 0,276 | 0,245 |
| <b>N-Acetyl-Neuraminic Acid</b>  | 0,198 | 0,243 | 0,342 | 0,248 | 0,294 | 0,249 |
| <b>Pectin</b>                    | 0,208 | 0,232 | 0,334 | 0,268 | 0,261 | 0,216 |
| <b>Sedoheptulosan</b>            | 0,175 | 0,225 | 0,375 | 0,265 | 0,285 | 0,243 |
| <b>Thymidine</b>                 | 0,211 | 0,226 | 0,378 | 0,278 | 0,260 | 0,253 |
| <b>Uridine</b>                   | 0,258 | 0,267 | 0,538 | 0,323 | 0,487 | 0,345 |
| <b>Adenosine</b>                 | 0,222 | 0,257 | 0,471 | 0,226 | 0,461 | 0,281 |
| <b>Inosine</b>                   | 0,211 | 0,326 | 0,585 | 0,233 | 0,645 | 0,410 |
| <b>Adonitol</b>                  | 0,162 | 0,235 | 0,280 | 0,155 | 0,254 | 0,225 |
| <b>L-Arabinose</b>               | 0,243 | 0,255 | 0,411 | 0,223 | 0,364 | 0,282 |
| <b>D-Arabinose</b>               | 0,244 | 0,236 | 0,337 | 0,278 | 0,275 | 0,261 |
| <b>β-Methyl-D-Xylopyranoside</b> | 0,213 | 0,238 | 0,356 | 0,263 | 0,283 | 0,248 |
| <b>Xylitol</b>                   | 0,222 | 0,235 | 0,387 | 0,291 | 0,341 | 0,259 |
| <b>Myo-Inositol</b>              | 0,198 | 0,230 | 0,331 | 0,251 | 0,301 | 0,246 |
| <b>Meso-Erythritol</b>           | 0,204 | 0,234 | 0,362 | 0,251 | 0,274 | 0,256 |
| <b>Propylene glycol</b>          | 0,215 | 0,253 | 0,372 | 0,256 | 0,306 | 0,253 |
| <b>Etanolamine</b>               | 0,239 | 0,176 | 0,341 | 0,278 | 0,214 | 0,192 |
| <b>D,L-α-Glycerol-P</b>          | 0,223 | 0,327 | 0,605 | 0,302 | 0,326 | 0,368 |
| <b>Glycerol</b>                  | 0,146 | 0,203 | 0,377 | 0,162 | 0,257 | 0,203 |
| <b>Citric acid</b>               | 0,145 | 0,204 | 0,220 | 0,159 | 0,298 | 0,161 |
| <b>Tricarballic Acid</b>         | 0,150 | 0,229 | 0,294 | 0,155 | 0,302 | 0,295 |
| <b>D,L-Lactic Acid</b>           | 0,187 | 0,259 | 0,393 | 0,192 | 0,336 | 0,276 |
| <b>Methyl D-Lactate</b>          | 0,145 | 0,223 | 0,356 | 0,164 | 0,309 | 0,274 |

|                                                    |       |       |       |       |       |       |
|----------------------------------------------------|-------|-------|-------|-------|-------|-------|
| <b>Methyl pyruvate</b>                             | 0,144 | 0,251 | 0,361 | 0,171 | 0,338 | 0,268 |
| <b>Pyruvic acid</b>                                | 0,371 | 0,558 | 0,662 | 0,315 | 0,648 | 0,624 |
| <b><math>\alpha</math>-Keto-Glutaric Acid</b>      | 0,229 | 0,269 | 0,457 | 0,210 | 0,487 | 0,312 |
| <b>Succinamic Acid</b>                             | 0,243 | 0,265 | 0,555 | 0,255 | 0,411 | 0,328 |
| <b>Succinic Acid</b>                               | 0,152 | 0,209 | 0,351 | 0,170 | 0,294 | 0,233 |
| <b>Mono-Methyl Succinate</b>                       | 0,216 | 0,283 | 0,640 | 0,233 | 0,456 | 0,363 |
| <b>L-Malic Acid</b>                                | 0,150 | 0,205 | 0,401 | 0,164 | 0,261 | 0,240 |
| <b>D-Malic Acid</b>                                | 0,147 | 0,220 | 0,323 | 0,154 | 0,253 | 0,229 |
| <b>Meso-Tartaric Acid</b>                          | 0,140 | 0,198 | 0,246 | 0,150 | 0,214 | 0,172 |
| <b>Acetoacetic Acid (a)</b>                        | 0,144 | 0,217 | 0,215 | 0,161 | 0,203 | 0,192 |
| <b><math>\gamma</math>-Amino-N-Butyric Acid</b>    | 0,147 | 0,244 | 0,299 | 0,138 | 0,287 | 0,253 |
| <b><math>\alpha</math>-Keto-Butyric Acid</b>       | 0,148 | 0,259 | 0,303 | 0,153 | 0,277 | 0,259 |
| <b><math>\alpha</math>-Hydroxy-Butyric Acid</b>    | 0,162 | 0,240 | 0,289 | 0,155 | 0,257 | 0,234 |
| <b>D,L-<math>\beta</math>-Hydroxy-Butyric Acid</b> | 0,149 | 0,216 | 0,296 | 0,149 | 0,250 | 0,205 |
| <b>Glycolic Acid</b>                               | 0,138 | 0,200 | 0,311 | 0,144 | 0,250 | 0,196 |
| <b>Butyric Acid</b>                                | 0,189 | 0,212 | 0,250 | 0,173 | 0,298 | 0,204 |
| <b>2,3-Butanediol</b>                              | 0,139 | 0,222 | 0,256 | 0,135 | 0,274 | 0,203 |
| <b>3-Hydroxy-2-Butanone</b>                        | 0,139 | 0,220 | 0,264 | 0,139 | 0,250 | 0,203 |
| <b>Propionic Acid</b>                              | 0,169 | 0,207 | 0,328 | 0,157 | 0,202 | 0,182 |
| <b>Acetic Acid</b>                                 | 0,144 | 0,204 | 0,256 | 0,144 | 0,223 | 0,168 |
| <b>Hexanoic Acid</b>                               | 0,138 | 0,166 | 0,220 | 0,147 | 0,242 | 0,181 |

**Table S2. Raw dye reduction mean values (590 nm) of metabolite array from the PM-M2 microplate.**

|                          | <b>CONTROL</b> | <b>ALISERTIB</b> | <b>DOXORUBICIN</b> | <b>CONTROL</b> | <b>BLEOMYCIN</b> | <b>PALBOCICLIB</b> |
|--------------------------|----------------|------------------|--------------------|----------------|------------------|--------------------|
| <b>negative control</b>  | 0,170          | 0,204            | 0,312              | 0,146          | 0,280            | 0,185              |
| <b>negative control</b>  | 0,180          | 0,234            | 0,345              | 0,175          | 0,276            | 0,185              |
| <b>negative control</b>  | 0,188          | 0,240            | 0,356              | 0,178          | 0,232            | 0,173              |
| <b>Tween 20</b>          | 0,150          | 0,193            | 0,242              | 0,150          | 0,214            | 0,122              |
| <b>Tween 40</b>          | 0,166          | 0,186            | 0,261              | 0,149          | 0,170            | 0,131              |
| <b>Tween 80</b>          | 0,140          | 0,166            | 0,269              | 0,140          | 0,137            | 0,104              |
| <b>Gelatin</b>           | 0,204          | 0,260            | 0,441              | 0,204          | 0,326            | 0,177              |
| <b>L-Alaninamide</b>     | 0,180          | 0,278            | 0,43               | 0,187          | 0,218            | 0,175              |
| <b>L-Alanine</b>         | 0,183          | 0,256            | 0,398              | 0,188          | 0,271            | 0,178              |
| <b>D-Alanine</b>         | 0,197          | 0,235            | 0,336              | 0,189          | 0,257            | 0,173              |
| <b>L-Arginine</b>        | 0,195          | 0,217            | 0,338              | 0,185          | 0,240            | 0,250              |
| <b>L-Asparagine</b>      | 0,168          | 0,198            | 0,287              | 0,147          | 0,282            | 0,252              |
| <b>L-Aspartic Acid</b>   | 0,192          | 0,243            | 0,34               | 0,203          | 0,241            | 0,166              |
| <b>D-Aspartic Acid</b>   | 0,185          | 0,212            | 0,286              | 0,189          | 0,208            | 0,170              |
| <b>L-Glutamic Acid</b>   | 0,266          | 0,291            | 0,476              | 0,268          | 0,310            | 0,254              |
| <b>D-Glutamic Acid</b>   | 0,222          | 0,292            | 0,438              | 0,201          | 0,256            | 0,200              |
| <b>L-Glutamine</b>       | 0,488          | 0,412            | 0,832              | 0,430          | 0,574            | 0,430              |
| <b>Glycine</b>           | 0,203          | 0,280            | 0,455              | 0,192          | 0,228            | 0,232              |
| <b>L-Histidine</b>       | 0,176          | 0,234            | 0,348              | 0,183          | 0,211            | 0,222              |
| <b>L-Homoserine</b>      | 0,179          | 0,238            | 0,326              | 0,195          | 0,202            | 0,226              |
| <b>Hydroxy-L-Proline</b> | 0,178          | 0,238            | 0,304              | 0,189          | 0,218            | 0,198              |
| <b>L-Isoleucine</b>      | 0,210          | 0,248            | 0,32               | 0,217          | 0,244            | 0,168              |
| <b>L-Leucine</b>         | 0,205          | 0,244            | 0,313              | 0,205          | 0,259            | 0,181              |

|                        |       |       |       |       |       |       |
|------------------------|-------|-------|-------|-------|-------|-------|
| <b>L-Lysine</b>        | 0,177 | 0,267 | 0,273 | 0,169 | 0,215 | 0,199 |
| <b>L-Methionine</b>    | 0,206 | 0,271 | 0,372 | 0,226 | 0,232 | 0,183 |
| <b>L-Ornithine</b>     | 0,211 | 0,266 | 0,472 | 0,200 | 0,269 | 0,231 |
| <b>L-Phenylalanine</b> | 0,309 | 0,293 | 0,405 | 0,281 | 0,273 | 0,281 |
| <b>L-Proline</b>       | 0,255 | 0,263 | 0,32  | 0,259 | 0,240 | 0,196 |
| <b>L-Serine</b>        | 0,266 | 0,239 | 0,335 | 0,245 | 0,226 | 0,247 |
| <b>D-Serine</b>        | 0,247 | 0,266 | 0,385 | 0,254 | 0,228 | 0,278 |
| <b>L-Threonine</b>     | 0,244 | 0,251 | 0,337 | 0,254 | 0,237 | 0,234 |
| <b>D-Threonine</b>     | 0,261 | 0,242 | 0,322 | 0,251 | 0,213 | 0,234 |
| <b>L-Tryptofan</b>     | 0,245 | 0,224 | 0,239 | 0,252 | 0,162 | 0,201 |
| <b>L-Tyrosine</b>      | 0,276 | 0,262 | 0,245 | 0,279 | 0,166 | 0,202 |
| <b>L-Valine</b>        | 0,219 | 0,247 | 0,318 | 0,212 | 0,265 | 0,235 |
| <b>Ala-Ala</b>         | 0,190 | 0,304 | 0,431 | 0,178 | 0,276 | 0,327 |
| <b>Ala-Arg</b>         | 0,193 | 0,335 | 0,491 | 0,208 | 0,290 | 0,315 |
| <b>Ala-Asn</b>         | 0,222 | 0,279 | 0,464 | 0,220 | 0,244 | 0,300 |
| <b>Ala-Asp</b>         | 0,249 | 0,272 | 0,377 | 0,268 | 0,269 | 0,269 |
| <b>Ala-Glu</b>         | 0,260 | 0,421 | 0,628 | 0,273 | 0,311 | 0,421 |
| <b>Ala-Gln</b>         | 0,500 | 0,671 | 0,907 | 0,450 | 0,584 | 0,630 |
| <b>Ala-Gly</b>         | 0,254 | 0,288 | 0,399 | 0,248 | 0,238 | 0,293 |
| <b>Ala-His</b>         | 0,259 | 0,251 | 0,329 | 0,228 | 0,284 | 0,250 |
| <b>Ala-Ile</b>         | 0,309 | 0,308 | 0,382 | 0,286 | 0,261 | 0,286 |
| <b>Ala-Leu</b>         | 0,277 | 0,285 | 0,321 | 0,230 | 0,301 | 0,272 |
| <b>Ala-Lys</b>         | 0,230 | 0,297 | 0,417 | 0,239 | 0,269 | 0,251 |
| <b>Ala-Met</b>         | 0,220 | 0,321 | 0,334 | 0,216 | 0,265 | 0,294 |
| <b>Ala-Phe</b>         | 0,213 | 0,381 | 0,391 | 0,192 | 0,273 | 0,304 |
| <b>Ala-Pro</b>         | 0,209 | 0,312 | 0,559 | 0,209 | 0,290 | 0,305 |

|                    |       |       |       |       |       |       |
|--------------------|-------|-------|-------|-------|-------|-------|
| <b>Ala-Ser</b>     | 0,220 | 0,272 | 0,468 | 0,226 | 0,254 | 0,288 |
| <b>Ala-Thr</b>     | 0,294 | 0,281 | 0,446 | 0,271 | 0,258 | 0,296 |
| <b>Ala-Trp</b>     | 0,284 | 0,260 | 0,334 | 0,256 | 0,201 | 0,303 |
| <b>Ala-Tyr</b>     | 0,295 | 0,325 | 0,519 | 0,281 | 0,312 | 0,304 |
| <b>Ala-Val</b>     | 0,276 | 0,303 | 0,429 | 0,260 | 0,283 | 0,327 |
| <b>Arg-Ala (b)</b> | 0,279 | 0,315 | 0,432 | 0,240 | 0,344 | 0,310 |
| <b>Arg-Arg (b)</b> | 0,279 | 0,315 | 0,358 | 0,242 | 0,260 | 0,289 |
| <b>Arg-Asp</b>     | 0,269 | 0,291 | 0,371 | 0,230 | 0,357 | 0,271 |
| <b>Arg-Gln</b>     | 0,418 | 0,927 | 1,038 | 0,398 | 0,689 | 0,622 |
| <b>Arg-Glu</b>     | 0,180 | 0,348 | 0,462 | 0,206 | 0,328 | 0,319 |
| <b>Arg-Ile (b)</b> | 0,181 | 0,389 | 0,402 | 0,178 | 0,313 | 0,260 |
| <b>Arg-Leu (b)</b> | 0,199 | 0,336 | 0,494 | 0,204 | 0,246 | 0,293 |
| <b>Arg-Lys (b)</b> | 0,201 | 0,287 | 0,495 | 0,211 | 0,257 | 0,316 |
| <b>Arg-Met (b)</b> | 0,296 | 0,289 | 0,406 | 0,259 | 0,252 | 0,327 |
| <b>Arg-Phe (b)</b> | 0,296 | 0,349 | 0,495 | 0,279 | 0,301 | 0,341 |
| <b>Arg-Ser (b)</b> | 0,266 | 0,309 | 0,433 | 0,252 | 0,331 | 0,277 |
| <b>Arg-Trp</b>     | 0,235 | 0,242 | 0,303 | 0,234 | 0,223 | 0,266 |
| <b>Arg-Tyr (b)</b> | 0,266 | 0,318 | 0,484 | 0,261 | 0,371 | 0,304 |
| <b>Arg-Val (b)</b> | 0,275 | 0,317 | 0,451 | 0,241 | 0,300 | 0,305 |
| <b>Asn-Glu</b>     | 0,283 | 0,332 | 0,463 | 0,250 | 0,426 | 0,300 |
| <b>Asn-Val</b>     | 0,260 | 0,299 | 0,4   | 0,251 | 0,320 | 0,316 |
| <b>Asp-Ala</b>     | 0,185 | 0,335 | 0,411 | 0,186 | 0,291 | 0,277 |
| <b>Asp-Asp</b>     | 0,170 | 0,330 | 0,321 | 0,163 | 0,264 | 0,249 |
| <b>Asp-Glu</b>     | 0,194 | 0,291 | 0,506 | 0,199 | 0,261 | 0,304 |
| <b>Asp-Gln</b>     | 0,228 | 0,435 | 0,975 | 0,232 | 0,550 | 0,518 |
| <b>Asp-Gly</b>     | 0,200 | 0,276 | 0,454 | 0,223 | 0,299 | 0,289 |



|                    |       |       |       |       |       |       |
|--------------------|-------|-------|-------|-------|-------|-------|
| <b>Asp-Leu</b>     | 0,196 | 0,271 | 0,437 | 0,227 | 0,277 | 0,304 |
| <b>Asp-Lys</b>     | 0,196 | 0,293 | 0,469 | 0,227 | 0,301 | 0,264 |
| <b>Asp-Phe</b>     | 0,200 | 0,306 | 0,465 | 0,230 | 0,296 | 0,279 |
| <b>Asp-Trp</b>     | 0,180 | 0,271 | 0,405 | 0,211 | 0,377 | 0,290 |
| <b>Asp-Val</b>     | 0,179 | 0,279 | 0,381 | 0,214 | 0,297 | 0,274 |
| <b>Glu-Ala</b>     | 0,213 | 0,405 | 0,607 | 0,215 | 0,387 | 0,317 |
| <b>Glu-Asp</b>     | 0,197 | 0,323 | 0,431 | 0,202 | 0,300 | 0,256 |
| <b>Glu-Glu</b>     | 0,204 | 0,340 | 0,504 | 0,204 | 0,341 | 0,332 |
| <b>Gly-Gly</b>     | 0,221 | 0,331 | 0,488 | 0,190 | 0,258 | 0,462 |
| <b>Glu-Ser</b>     | 0,199 | 0,290 | 0,512 | 0,206 | 0,267 | 0,289 |
| <b>Glu-Trp</b>     | 0,204 | 0,245 | 0,339 | 0,225 | 0,178 | 0,361 |
| <b>Gly-Tyr</b>     | 0,203 | 0,301 | 0,478 | 0,227 | 0,270 | 0,341 |
| <b>Glu-Val</b>     | 0,216 | 0,304 | 0,598 | 0,210 | 0,268 | 0,389 |
| <b>Gln-Glu</b>     | 0,263 | 0,718 | 1,11  | 0,297 | 0,683 | 0,714 |
| <b>Gln-Gln</b>     | 0,403 | 0,690 | 1,107 | 0,410 | 0,631 | 0,752 |
| <b>Gln-Gly</b>     | 0,328 | 0,588 | 0,983 | 0,354 | 0,617 | 0,597 |
| <b>Gly-Ala</b>     | 0,197 | 0,315 | 0,411 | 0,193 | 0,259 | 0,283 |
| <b>Gly-Arg</b>     | 0,203 | 0,273 | 0,359 | 0,192 | 0,245 | 0,245 |
| <b>Gly-Asn</b>     | 0,196 | 0,316 | 0,404 | 0,191 | 0,266 | 0,271 |
| <b>Gly-Asp</b>     | 0,194 | 0,326 | 0,347 | 0,186 | 0,244 | 0,270 |
| <b>α-D-Glucose</b> | 2,647 | 1,859 | 2,572 | 2,390 | 2,691 | 1,851 |

**PM-M2**

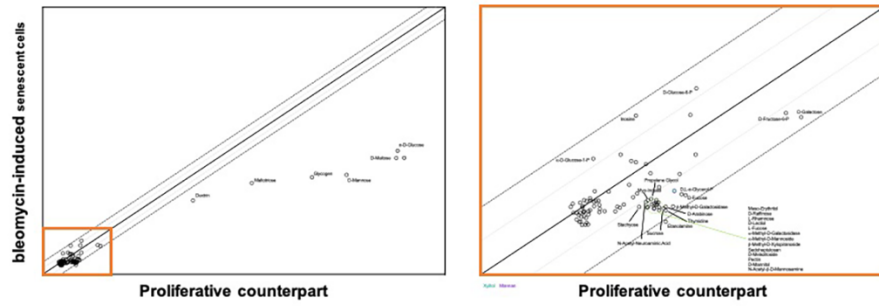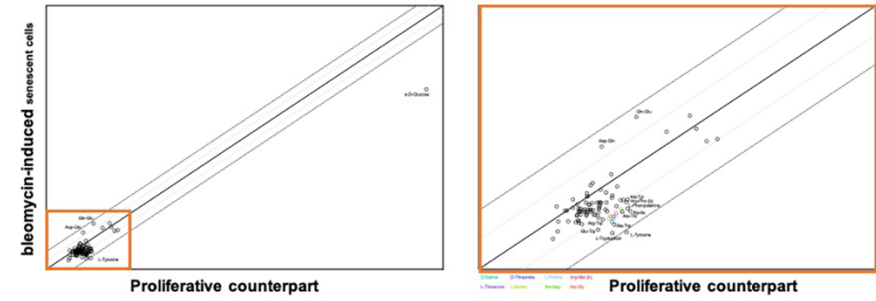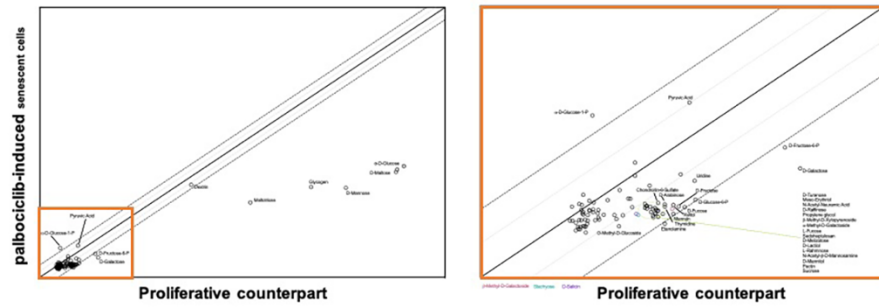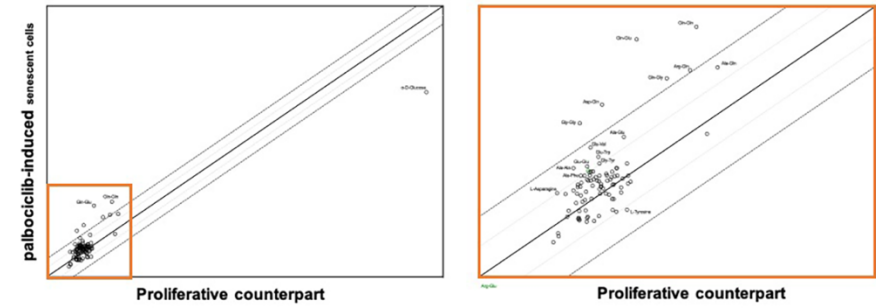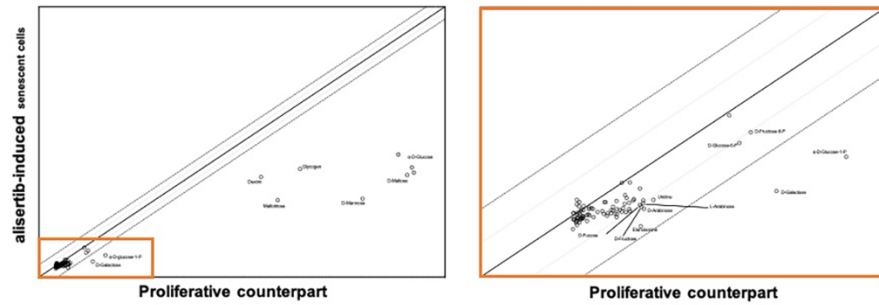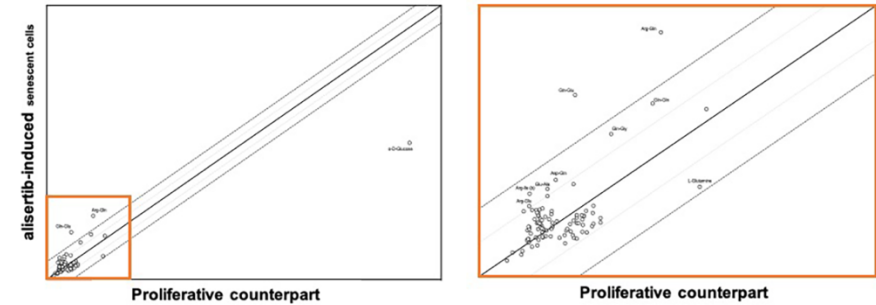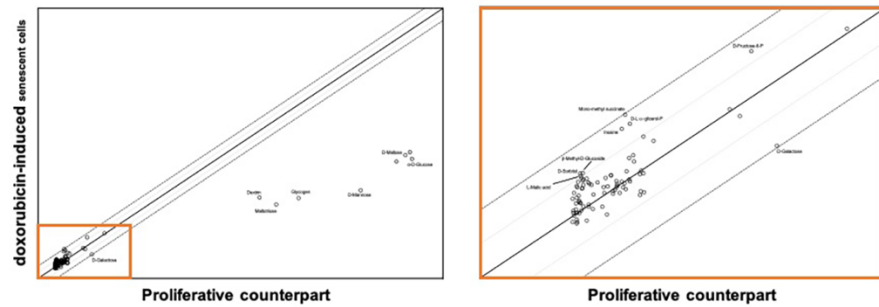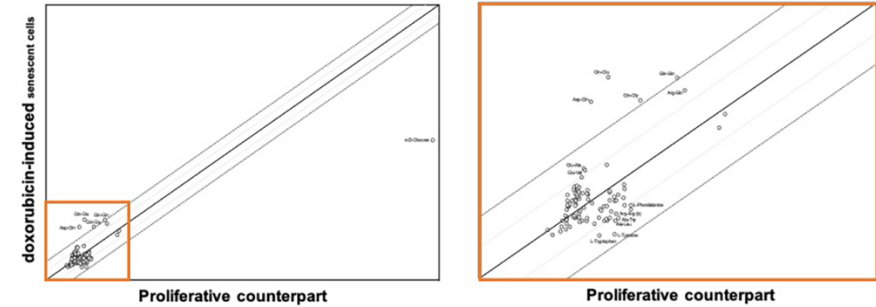

**Figure S1. Comparison of substrate utilization by TIS and proliferative cells.** To quantitatively compare each senescent state rapidly and systematically, changes in the substrate consumption of carbohydrate/carboxylate substrates (PM-M1) and amino acids/dipeptide combinations (PM-M2) were initially characterized based on the fold-change in the optical density of each substrate at 590 nm (purple color) resulting from the accumulation of reduced dye over a 90-minute period after normalization of the values to those of the negative-control wells included in each of the PM-M plates. We then calculated a comparison score from the absolute ratio between the substrate utilization of each pair of TIS cells and proliferative counterparts using  $\pm 1.5$  (*grey dashed line*) and  $\pm 2.0$  (*black dashed line*) fold-change cut-offs.

Proliferative counterpart #1

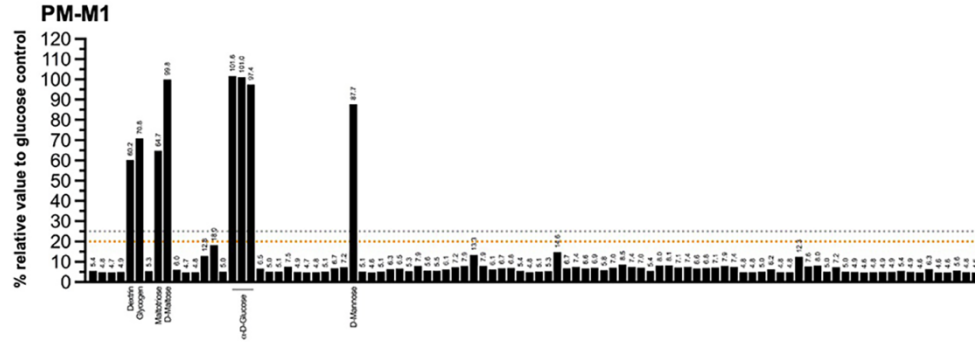

Proliferative counterpart #2

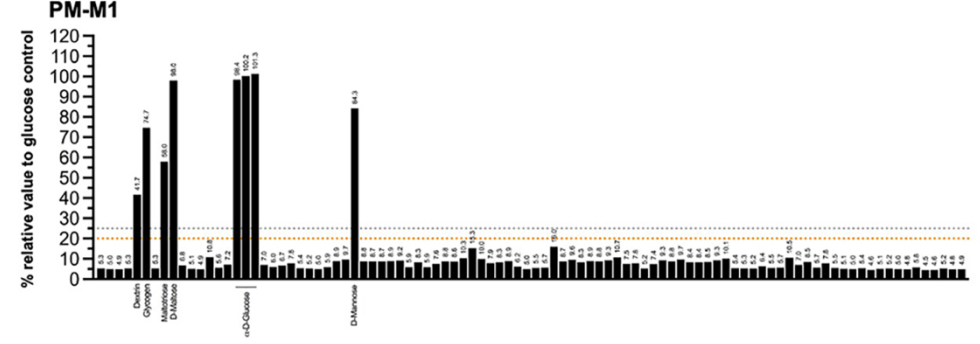

bleomycin-induced senescent cells

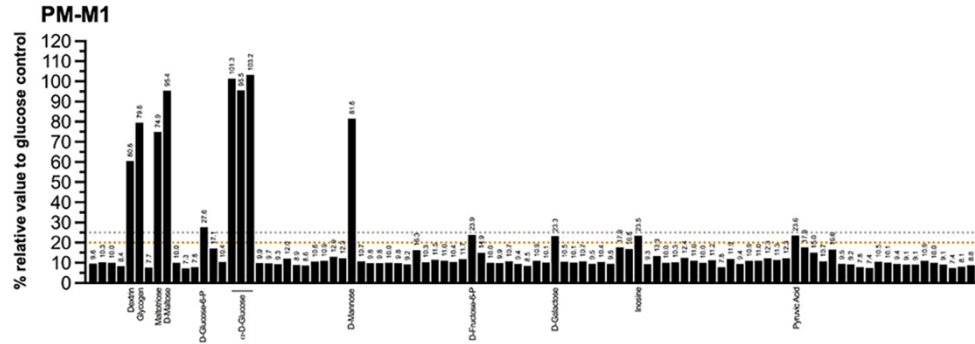

palbociclib-induced senescent cells

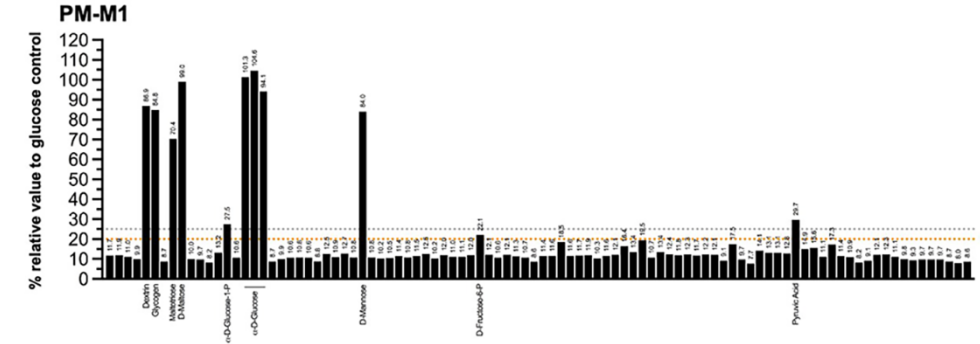

alisertib-induced senescent cells

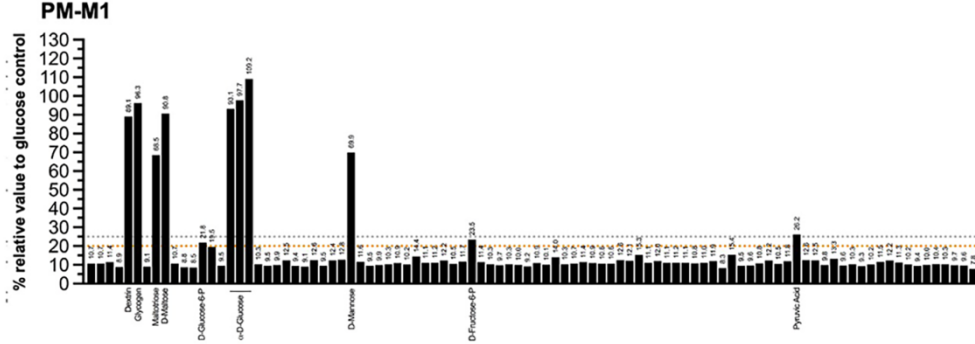

doxorubicin-induced senescent cells

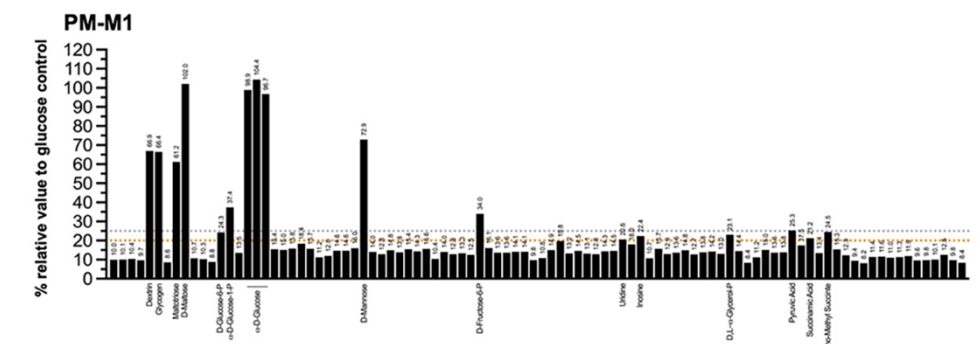

### Proliferative counterpart #1

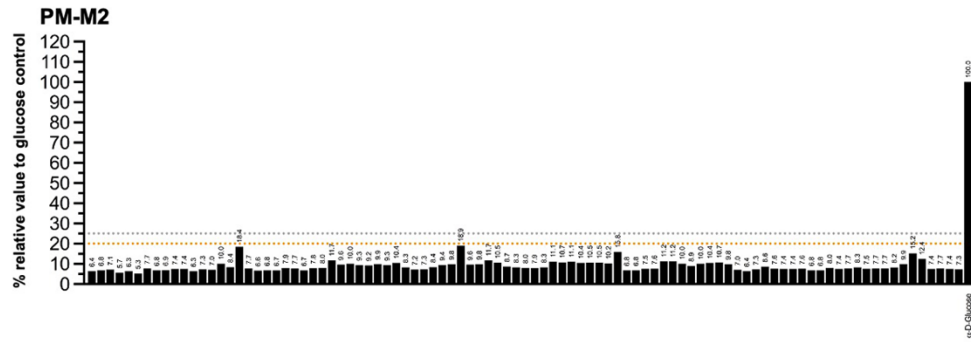

### Proliferative counterpart #2

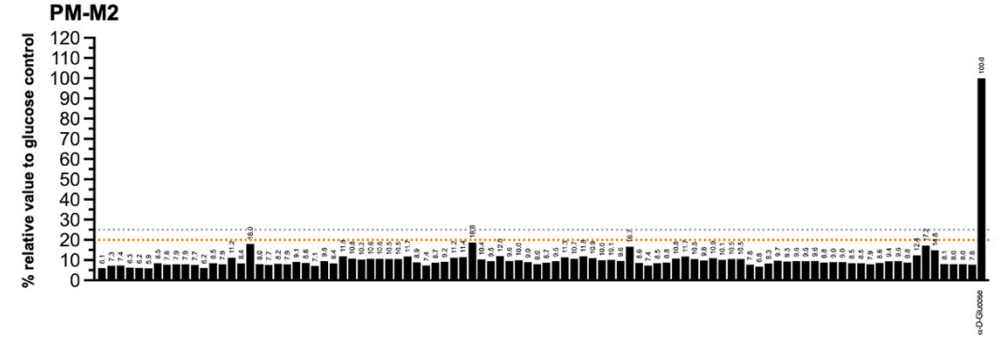

**bleomycin-induced senescent cells**

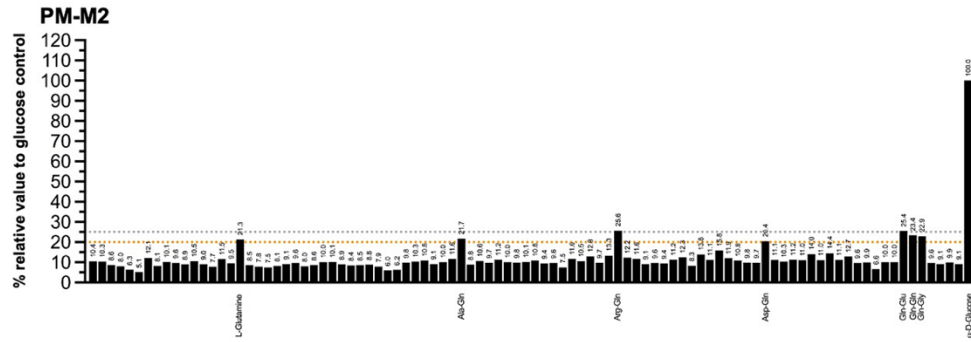

palbociclib-induced senescent cells

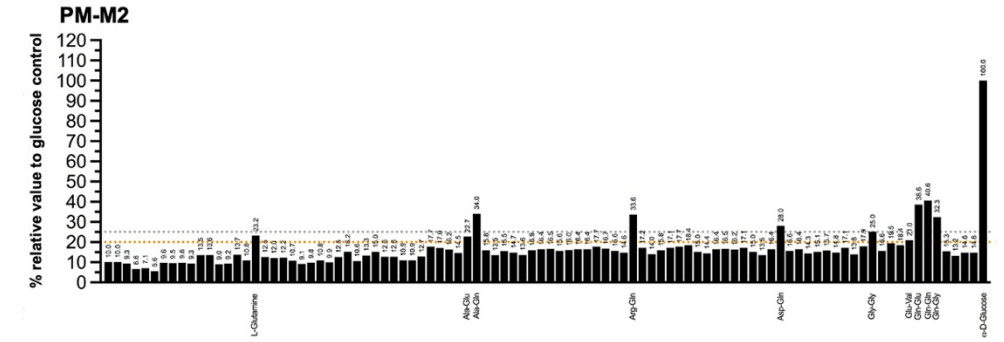**alisertib-induced senescent cells**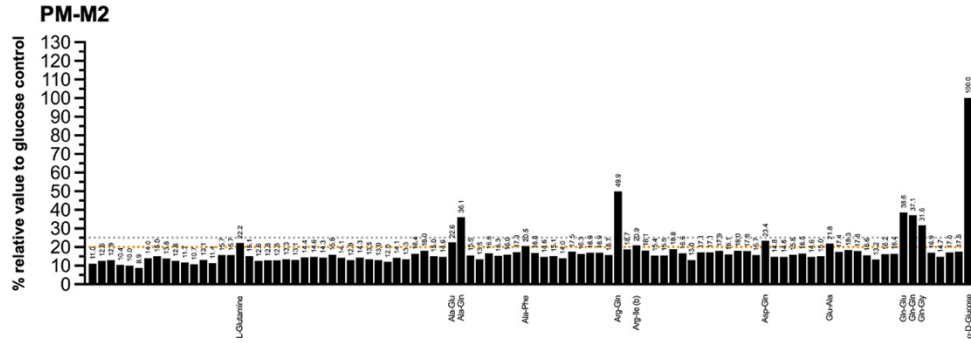

doxorubicin-induced senescent cells

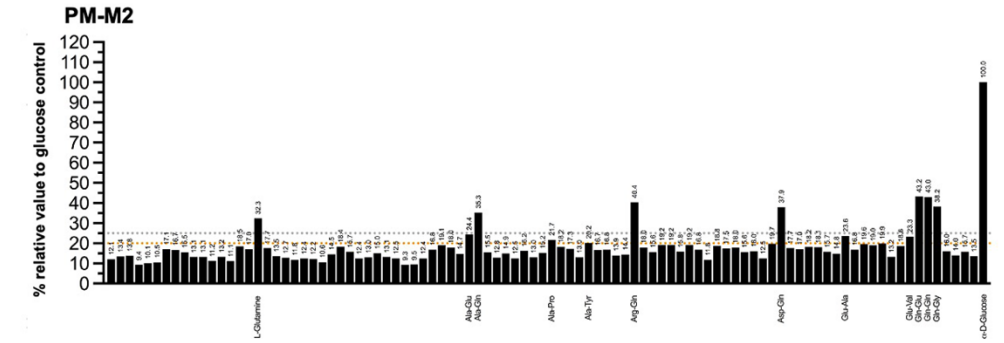

**Figure S2. Metabolic fingerprints of nutrients supporting bioenergetic activity of TIS cells in the absence of glucose.** Substrate utilization of proliferative/TIS cells was normalized to that of the positive controls, i.e., wells pre-loaded with glucose, in PM-M1 and PM-M2 plates. We established 20% (orange dashed line) and 25% (dark grey dashed line) cut-offs to select significant nutritional rescuers of glucose deprivation in TIS cells.
